# Supplementary material for: Isolation of DNA aptamers using micro free flow electrophoresis
Source: Royal Society of Chemistry journal article supplement (doi:10.1039/c1lc20461k), 2011-01-01
Supplement: c1lc20461k.pdf [file c1lc20461k.pdf]

## Supporting Information

### Isolation of DNA Aptamers Using Micro Free Flow Electrophoresis

Meng Jing and Michael T. Bowser\*

Department of Chemistry, University of Minnesota, 207 Pleasant Street SE, Minneapolis, Minnesota  
55455, United States

Email: [bowser@umn.edu](mailto:bowser@umn.edu)

#### Aptamer Sequences

Sequences obtained from cloning and Sanger sequencing are listed below. 23 sequences were obtained from round 1, 28 sequences were obtained from round 2, 19 sequences were obtained from round 3, and 6 sequences were obtained from round 4. Primer regions are in bold.

Table S 1. Aptamer sequences from round 1 through 4

| Clone | Sequence (5'→3')                                                                          |
|-------|-------------------------------------------------------------------------------------------|
| 1.1   | <b>AGCAGCACAGAGGTCAGAT</b> GTTATCAACGCGTCTGTCTATAAACTCATGTAATAATCCTATGCGTGCTACCGTGAA      |
| 1.2   | <b>AGCAGCACAGAGGTCAGAT</b> GCCTGTGCCATTATATGCTAAGGAAATTCATTACGTTCCCTATGCGTGCTACCGTGAA     |
| 1.3   | <b>AGCAGCACAGAGGTCAGAT</b> GGGACTAACTCATGATTCAGTACGATAGATCCTACCATTCCCTATGCGTGCTACCGTGAA   |
| 1.4   | <b>AGCAGCACAGAGGTCAGAT</b> GATCATAGGTCTGCTTGCTTGATTATTTGAGCGGTCCATCCCTATGCGTGCTACCGTGAA   |
| 1.5   | <b>AGCAGCACAGAGGTCAGAT</b> GGCTATAACTCAGATTACAATATTTTGAATTGGTCCCAATCCTATGCGTGCTACCGTGAA   |
| 1.6   | <b>AGCAGCACAGAGGTCAGAT</b> GTAGCAAGAGTACTGAGTAAATCTACAATTTAGCCATTAACCTATGCGTGCTACCGTGAA   |
| 1.7   | <b>AGCAGCACAGAGGTCAGAT</b> GATTCCAAAGTTCCATCTAAAGCGATTATAGGGTACTTCCCTATGCGTGCTACCGTGAA    |
| 1.8   | <b>AGCAGCACAGAGGTCAGAT</b> GGGCGCGTTTTCTGTTCTGGATCGGCTCCACGGCTGCTATGCGTGCTACCGTGAA        |
| 1.9   | <b>AGCAGCACAGAGGTCAGAT</b> GTTGAACGAAACCTAATTAATGTTTTCTCGTTAAGCGACCTATGCGTGCTACCGTGAA     |
| 1.10  | <b>AGCAGCACAGAGGTCAGAT</b> GACCTGACCTTTTATCTCTCAGCTATAATTTGCTTTGTTCCCTATGCGTGCTACCGTGAA   |
| 1.11  | <b>AGCAGCACAGAGGTCAGAT</b> GTTAACAACCTTCGCTTAACGACTATAGCATCGGCCTGTACCTATGCGTGCTACCGTGAA   |
| 1.12  | <b>AGCAGCACAGAGGTCAGAT</b> GAAATTTCTATCGTCAGTTTATGAATCGGGAGGAAAGCGCGGCTATGCGTGCTACCGTGAA  |
| 1.13  | <b>AGCAGCACAGAGGTCAGAT</b> GACTTAGTTTCTAGAAATGAGTACTATGGTATAAGGTCGATCCCTATGCGTGCTACCGTGAA |
| 1.14  | <b>AGCAGCACAGAGGTCAGAT</b> GGATCATCTTTTAAAGCAGGAGCTCTTATTATTAGAATCCCTATGCGTGCTACCGTGAA    |
| 1.15  | <b>AGCAGCACAGAGGTCAGAT</b> GGCGCATTATCCTAGCGCTGGGAGGCTCTATTAAGGCCGGGCTATGCGTGCTACCGTGAA   |
| 1.16  | <b>AGCAGCACAGAGGTCAGAT</b> GGCTTGTTTTAGTTATCAAAAGATCGTGTAGCCACATTTCCCTATGCGTGCTACCGTGAA   |
| 1.17  | <b>AGCAGCACAGAGGTCAGAT</b> GACAGTAAGTACTAGAAATAGCGTGCTCAAACCGTTAGAGCCTATGCGTGCTACCGTGAA   |
| 1.18  | <b>AGCAGCACAGAGGTCAGAT</b> GGAGGGTATTAAGCTATAAATTATTGCGGGAACCCGTTATCCTATGCGTGCTACCGTGAA   |
| 1.19  | <b>AGCAGCACAGAGGTCAGAT</b> GCCAGCACAGTCTTGTCATTTAGAGGTATTATTGTTGTTCCCTATGCGTGCTACCGTGAA   |
| 1.20  | <b>AGCAGCACAGAGGTCAGAT</b> GCTAGATATTATTGGCATGAAGACTCTACTGAAGGGACATGCCTATGCGTGCTACCGTGAA  |
| 1.21  | <b>AGCAGCACAGAGGTCAGAT</b> GCGAGTTTTAATAATAAGCTACAATTATTGAGCACGTTGAACCTATGCGTGCTACCGTGAA  |
| 1.22  | <b>AGCAGCACAGAGGTCAGAT</b> GTTGGAGGGTGTCTAAGTTCGCGTGTGTGATGTGGACTACCTATGCGTGCTACCGTGAA    |
| 1.23  | <b>AGCAGCACAGAGGTCAGAT</b> GCTTACCTCCCTCACGATAACCCGGAAGTAGTCGACTAACCCTATGCGTGCTACCGTGAA   |
| 2.1   | <b>AGCAGCACAGAGGTCAGAT</b> GCCAGCGTTAGAGACTCCGACCTGGTGACATGTATTACAACCTATGCGTGCTACCGTGAA   |
| 2.2   | <b>AGCAGCACAGAGGTCAGAT</b> GAGTTGCCAGCTTATCCGGACAATAATAGTGCGGTTTGCCTATGCGTGCTACCGTGAA     |
| 2.3   | <b>AGCAGCACAGAGGTCAGAT</b> GTACATGCATAAATATACAGTCTTTTTGTGCTCAACCTATGCGTGCTACCGTGAA        |
| 2.4   | <b>AGCAGCACAGAGGTCAGAT</b> GTGCTCAATTTCAAGCTGTTGCATCTAGGCTAAAGTGCATCCTATGCGTGCTACCGTGAA   |
| 2.5   | <b>AGCAGCACAGAGGTCAGAT</b> GCAGGGCAATGTTATGTGTTAGGAAAATTAAGCACTGCCTATGCGTGCTACCGTGAA      |
| 2.6   | <b>AGCAGCACAGAGGTCAGAT</b> GAGGGTTAGATGAAACCTTTAGTTGGGGGTCGAAAACCTATGCGTGCTACCGTGAA       |
| 2.7   | <b>AGCAGCACAGAGGTCAGAT</b> GATCAACGTAAGCTTTTCTCATTATTAAGTAGTCTAAAGCCTATGCGTGCTACCGTGAA    |
| 2.8   | <b>AGCAGCACAGAGGTCAGAT</b> GAGCACATGGGATCAGTTCTCTTCTGTATGCGCATAGAGGCTCCTATGCGTGCTACCGTGAA |
| 2.9   | <b>AGCAGCACAGAGGTCAGAT</b> GTCGGGTATCCTTATAACATTAAGGCTAACTCATTAGTTTACCTATGCGTGCTACCGTGAA  |
| 2.10  | <b>AGCAGCACAGAGGTCAGAT</b> GCATTTCCGTAGCACTCTCTCTAATAGGGTAAAGATTTAGCCTATGCGTGCTACCGTGAA   |
| 2.11  | <b>AGCAGCACAGAGGTCAGAT</b> GCTTAAAAACGTTCAACCTGCGTGCTTATTTCACTACTGCTATGCGTGCTACCGTGAA     |
| 2.12  | <b>AGCAGCACAGAGGTCAGAT</b> GGAATACCGTACGGTGCTCGGTAGTGGTGGTCCCGGTTAGACCTATGCGTGCTACCGTGAA  |
| 2.13  | <b>AGCAGCACAGAGGTCAGAT</b> GCTCCGCATACAAAATAATTTATTAGTCATTATTTGACCTATGCGTGCTACCGTGAA      |

---

|       |                                                                                    |
|-------|------------------------------------------------------------------------------------|
| 2.14  | AGCAGCACAGAGGTCAGATGCTTCGGGCTATGTCATAGAAGTATAGGTAGGTGTTTAAAGCCTATGCGTGCTACCGTGAA   |
| 2.15  | AGCAGCACAGAGGTCAGATGACGTTCCGGGAAATTCTCAGAGTGATACGCTGTTTTAATACCTATGCGTGCTACCGTGAA   |
| 2.16  | AGCAGCACAGAGGTCAGATGGCTTTGGGGATGAATCTCATGATATTATGTTCTCACCCCTATGCGTGCTACCGTGAA      |
| 2.17  | AGCAGCACAGAGGTCAGATGAGGCTTAACACGTATCGCCAGTCATATAGCCAATCACAGCCTATGCGTGCTACCGTGAA    |
| 2.18  | AGCAGCACAGAGGTCAGATGCAAGTCTCGACGATAATTTAGGCTATAATAGTCTACACACCTATGCGTGCTACCGTGAA    |
| 2.19  | AGCAGCACAGAGGTCAGATGCATTAGGTTGCGGCGGACTTTGATGGTTGCTGGGGCGGCCATGCGTGCTACCGTGAA      |
| 2.20  | AGCAGCACAGAGGTCAGATGTGGAGACTGCTGTGCTGGGGTCCGGTTGAGATAGTGAGGGGCCATGCGTGCTACCGTGAA   |
| 2.21  | AGCAGCACAGAGGTCAGATGGTCAAAGCTTATTCGTTGAGTAAGTGCATCAACGACCACCTATGCGTGCTACCGTGAA     |
| 2.22  | AGCAGCACAGAGGTCAGATGTTCCATATAGCCGACCATGCTGTAGGTCGATCTATACCTATGCGTGCTACCGTGAA       |
| 2.23  | AGCAGCACAGAGGTCAGATGAAGCATTGATCCTAGCGTTAGGCTATGGCTTTACTTAAACCTATGCGTGCTACCGTGAA    |
| 2.24  | AGCAGCACAGAGGTCAGATGCTCCGCATACAAAAATAATTTATTAGTCATTATTTCCGACCTATGCGTGCTACCGTGAA    |
| 2.25  | AGCAGCACAGAGGTCAGATGGTAGCTTGGTGTAATAAATTCACAAGACTGGTGATCCCTATGCGTGCTACCGTGAA       |
| 2.26  | AGCAGCACAGAGGTCAGATGTGCGTGTGCTATTAAGTGACTCCTAGGGGCTAACTAGTGCCTATGCGTGCTACCGTGAA    |
| 2.27  | AGCAGCACAGAGGTCAGATGGTCAAAGGGCGCTGTTTGGCGGGGTAATTCCTACGATCCTATGCGTGCTACCGTGAA      |
| 2.28  | AGCAGCACAGAGGTCAGATGGATTAGTATCCGAGCAGTGAAGTAACCTGCGTGCCGTAACCTATGCGTGCTACCGTGAA    |
| <hr/> |                                                                                    |
| 3.1   | AGCAGCACAGAGGTCAGATGTATACCAGCTTTTATGGCTTTCATTCTCATAATGGGCCCTATGCGTGCTACCGTGAA      |
| 3.2   | AGCAGCACAGAGGTCAGATGTAAC TAGATCGTATATACGCGTATGAAGGTTCCGTTAATAGCCTATGCGTGCTACCGTGAA |
| 3.3   | AGCAGCACAGAGGTCAGATGAGGCGGATATGTTTTCTTTCCGAGGTGGTTTTCCAGGTCCTATGCGTGCTACCGTGAA     |
| 3.4   | AGCAGCACAGAGGTCAGATGGGCTGAGTTTACATTTTATAGTAGTAATGAACTTTCAAACCTATGCGTGCTACCGTGAA    |
| 3.5   | AGCAGCACAGAGGTCAGATGTATAGTTATTTCAATGTTTCTAGGTACAGTGGTATAACCTATGCGTGCTACCGTGAA      |
| 3.6   | AGCAGCACAGAGGTCAGATGTATGCAATGTTCTCAGTCGTGAAAACCTTGCCTATGTTCCCTATGCGTGCTACCGTGAA    |
| 3.7   | AGCAGCACAGAGGTCAGATGAATGAGTACAGATTTGGTCTAAGCTTCTCTATTTAAAGACCTATGCGTGCTACCGTGAA    |
| 3.8   | AGCAGCACAGAGGTCAGATGTTTAGGTCGCTCAGTACAGGCCATCTATTTGTCTGAGATCCTATGCGTGCTACCGTGAA    |
| 3.9   | AGCAGCACAGAGGTCAGATGAAGTTAAAGAATGGGCGTTTTGTGTAATAAAGTCAACCTATGCGTGCTACCGTGAA       |
| 3.10  | AGCAGCACAGAGGTCAGATGGTCAGAGGGTAGCTTGATGGTGGGTGCGGGGGGCGAGTCTATGCGTGCTACCGTGAA      |
| 3.11  | AGCAGCACAGAGGTCAGATGTACTATTTTAGCCCTGTTCTCATTCTGCTTAGCGAACAACCTATGCGTGCTACCGTGAA    |
| 3.12  | AGCAGCACAGAGGTCAGATGTGATTGTTAACC GGCTGTGTGGTCCATATTCATCTCCCCTATGCGTGCTACCGTGAA     |
| 3.13  | AGCAGCACAGAGGTCAGATGCATATAGTCTGCAAGTGGGAAACTGGTTATAGACCTACCCCTATGCGTGCTACCGTGAA    |
| 3.14  | AGCAGCACAGAGGTCAGATGTATAGTTATTTCAATGTTTCTAGGTACAGTGGTATAACCTATGCGTGCTACCGTGAA      |
| 3.15  | AGCAGCACAGAGGTCAGATGTCGCAGCTCGGTTGATCAGTGGCGGGGCTCCCGTCTTTGCTATGCGTGCTACCGTGAA     |
| 3.16  | AGCAGCACAGAGGTCAGATGTTGATGTTCTCCGTTCTGCCGTTTAACTCAGTTTAGGCACCCCTATGCGTGCTACCGTGAA  |
| 3.17  | AGCAGCACAGAGGTCAGATGATACTCCAAATCTATGAAAACGATGCGAACCAACTACTTCTATGCGTGCTACCGTGAA     |
| 3.18  | AGCAGCACAGAGGTCAGATGTATATATCGATACATTTTACTGACGCTACCAACCTGCCCTATGCGTGCTACCGTGAA      |
| 3.19  | AGCAGCACAGAGGTCAGATGGAACGCTCCGCATGTTAGCGTCTTAAAGTCTACTCCCTATGCGTGCTACCGTGAA        |
| <hr/> |                                                                                    |
| 4.1   | AGCAGCACAGAGGTCAGATGGTTCTAGAAGTGCATTTATAAGTATCGGTTAAGTAACTTCTATGCGTGCTACCGTGAA     |
| 4.2   | AGCAGCACAGAGGTCAGATGATTCTGGGGAGTGGTACCTACCAGTGCCACCCCGTTATCCTATGCGTGCTACCGTGAA     |
| 4.3   | AGCAGCACAGAGGTCAGATGATGTTAGGTGTGAACCGTAGTAGGTAAGGTTGAAATCACGCCTATGCGTGCTACCGTGAA   |
| 4.4   | AGCAGCACAGAGGTCAGATGATTCTGGGGAGTGGTACGTAAGCAGTGCCACCACGGTTATCCTATGCGTGCTACCGTGAA   |
| 4.5   | AGCAGCACAGAGGTCAGATGATTCTGGGGAGTGGTACGTAAGCAGTGCCACCACGGTTATCCTATGCGTGCTACCGTGAA   |
| 4.6   | AGCAGCACAGAGGTCAGATGATTCTGGGGAGTGGTACGTAAGCAGTGCCACCACGGTTATCCTATGCGTGCTACCGTGAA   |

---
